# Supplementary material for: Two-year measurements of Black Carbon properties at the high-altitude mountain site of Pic du Midi Observatory in the French Pyrenees
Source: Copernicus journal article supplement (doi:10.5194/egusphere-2023-570), 2023-04-11
Supplement: Supplementary file 1 [file egusphere-2023-570-supplement.pdf]

## Supplement

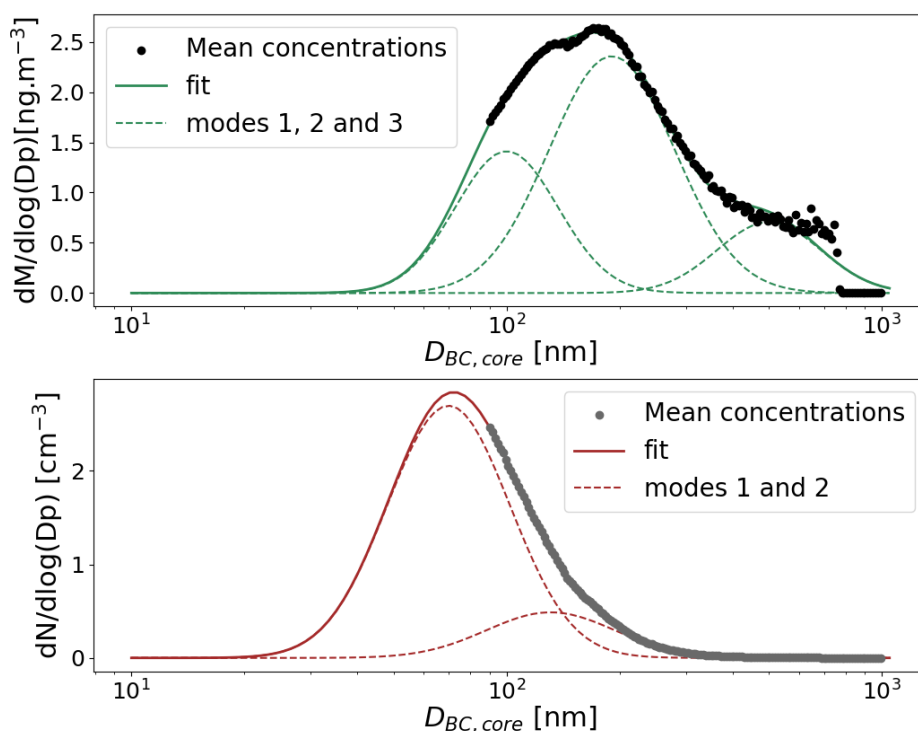

Figure S1: BC core mass (top) and number (bottom) size distribution measured by the SP2. Lognormal fits are overlaid in plain colored line with the 3 modes detailed in dashed colored lines.

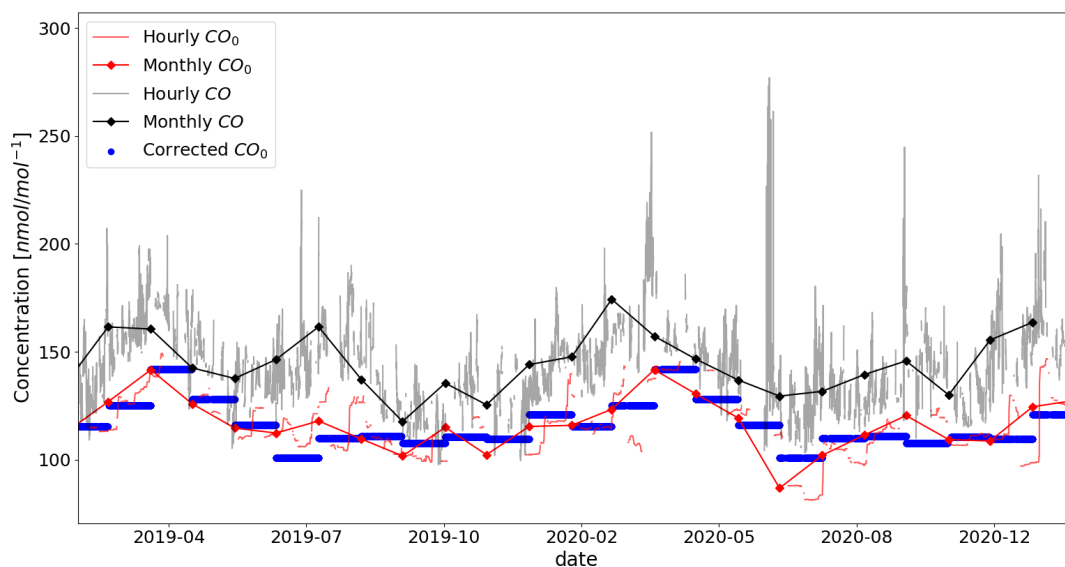

Figure S2: Determination of  $\Delta BC/\Delta CO$  emission ratios. Hourly background  $\text{CO}$  (red line) was calculated as the 14-day rolling 5th percentile of  $\text{CO}$  hourly concentrations (in gray). Then these values were averaged by months (red and blue dots)

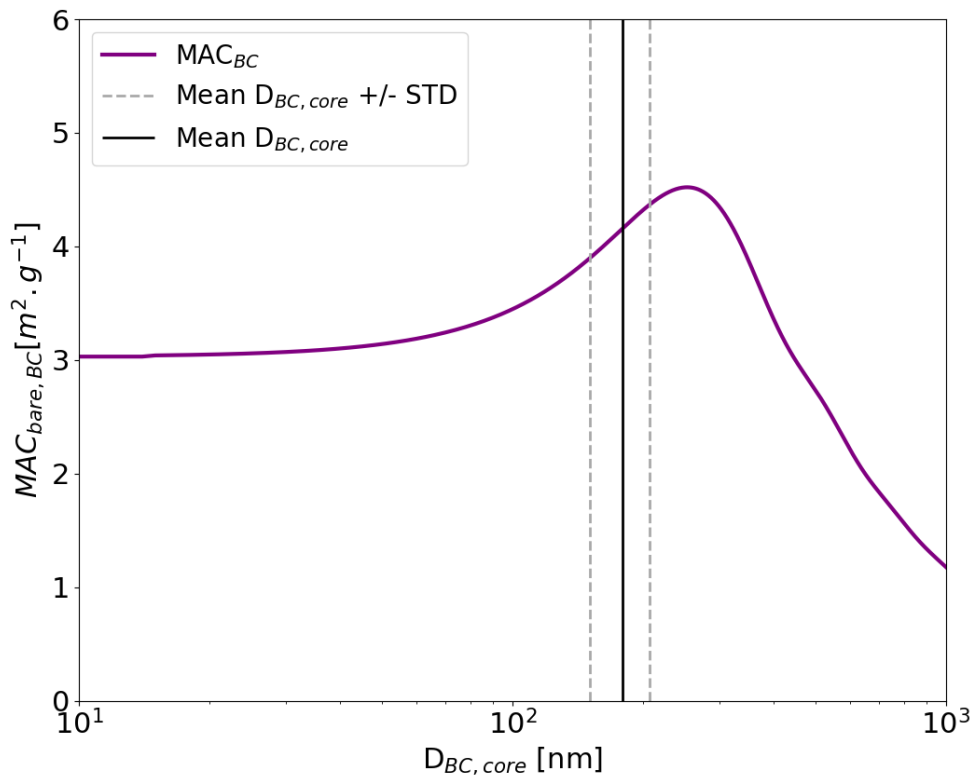

Figure S3: Bare BC MAC calculation with Mie theory as a function of the BC core diameter. Vertical solid and dashed lines are the mean  $D_{BC,core}$  and standard deviation, respectively.

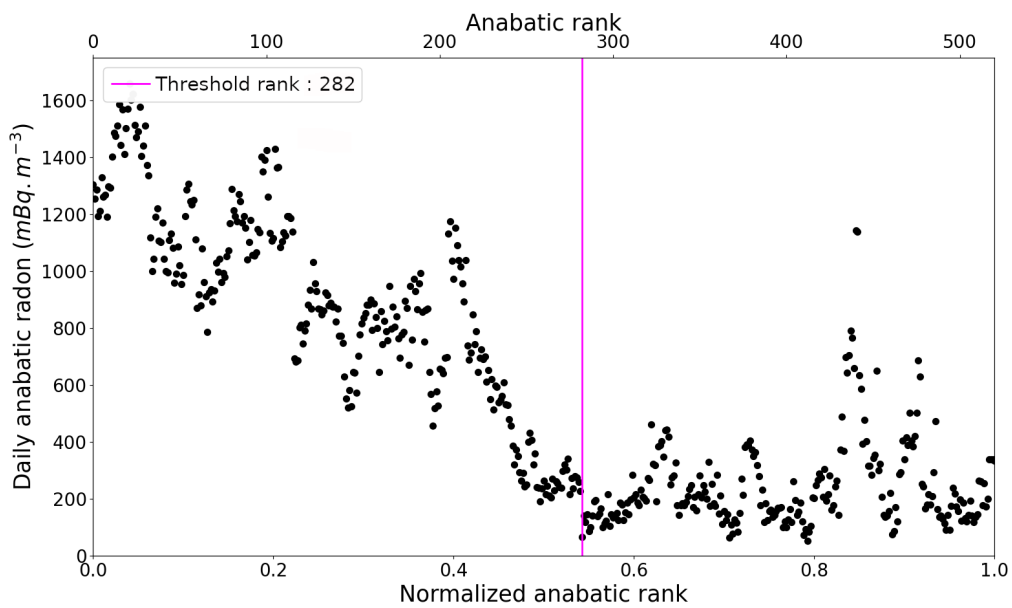

Figure S4: Daily anabatic radon as function of the day anabatic rank (see text for details). Each dot represent an observation day ranked from the most anabatically-influenced day (left) to the least one (right). The vertical pink line represents the cut-off rank before which days can be considered as PBL-influenced.

Table S1 : Statistics of BL/FT cases determination at PDM

|                      | All the campaign | Winter | Summer |
|----------------------|------------------|--------|--------|
| FT conditions (h)    | 1149             | 294    | 293    |
| BL influence (h)     | 894              | 105    | 318    |
| %age of FT influence | 56.2             | 73.2   | 47.9   |

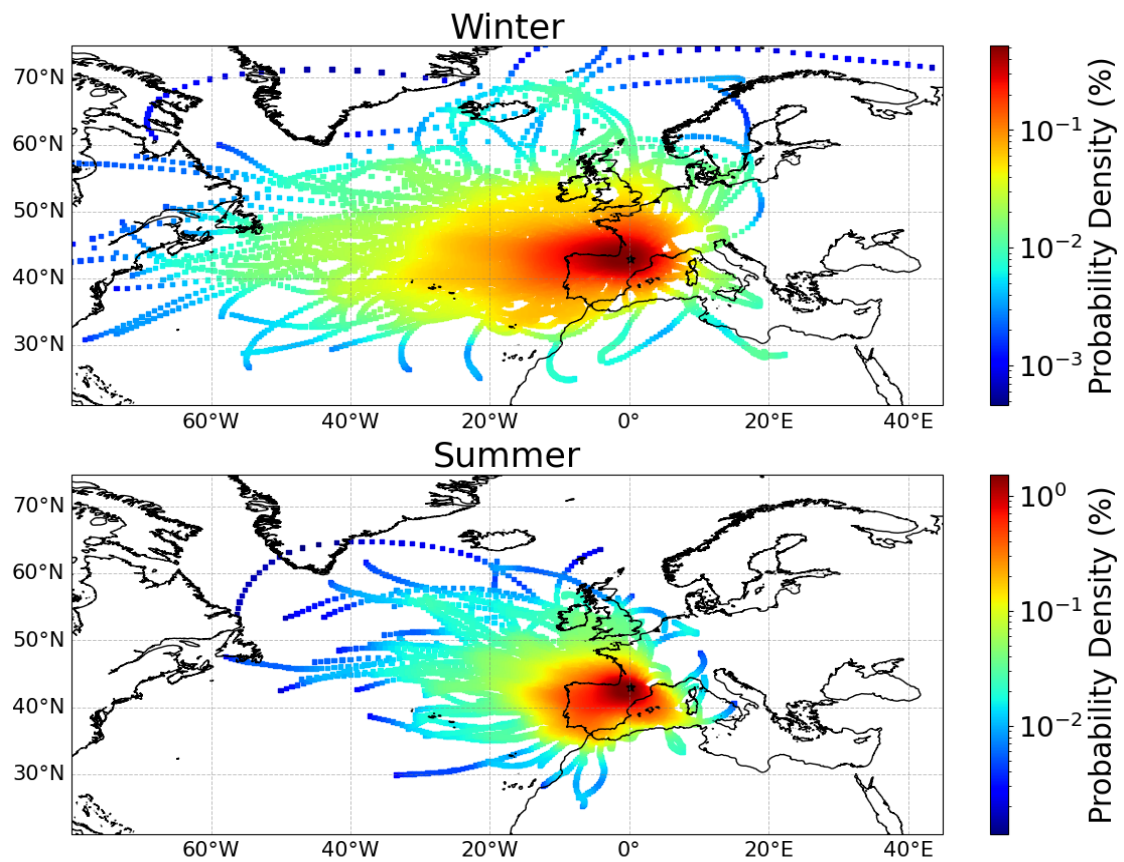

Figure S5: Computed density of airmass backtrajectories reaching PDM during the campaign calculated with the HYSPLIT model for winter and summer.

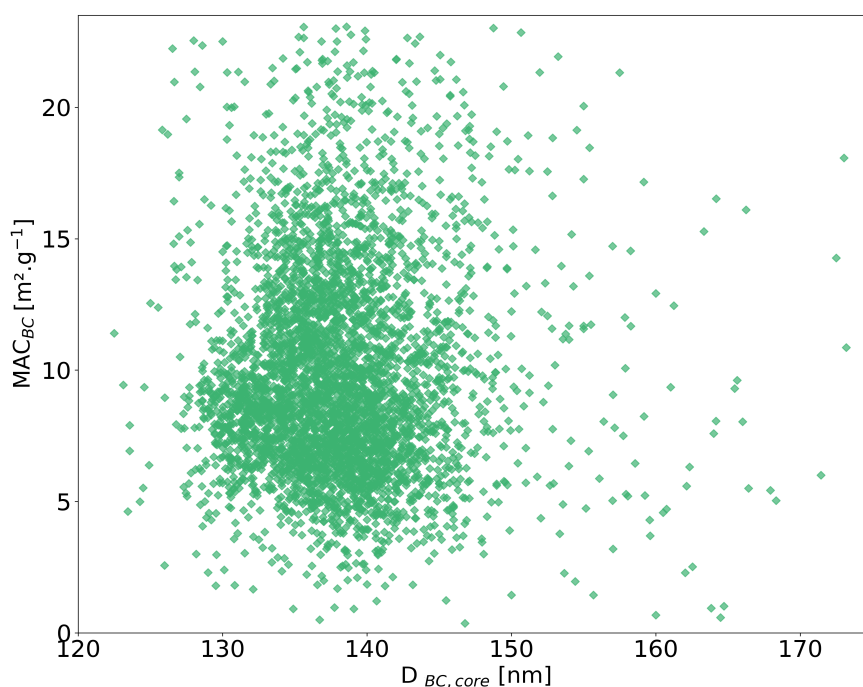

Figure S6:  $MAC_{BC}$  as a function of  $D_{BC,core}$  over the campaign. Each point represents 1h average data.

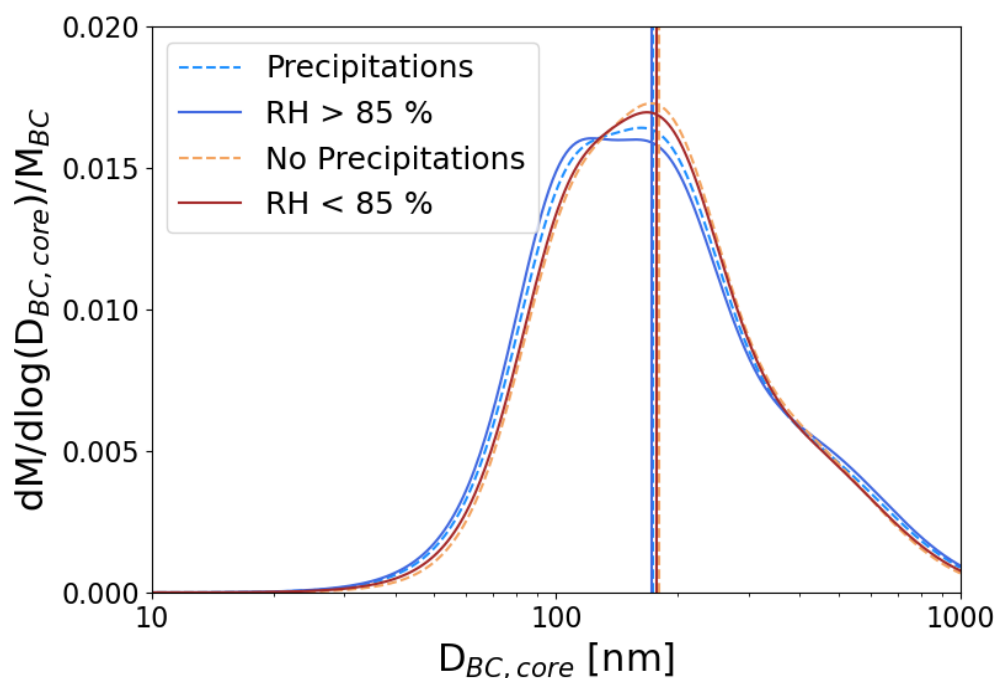

Figure S7 :Mass size distributions of BC core measured by the SP2 as a function of the presence or not of precipitations along the path of airmasses arriving at PDM , and whether the relative humidity was over 85 % or not.

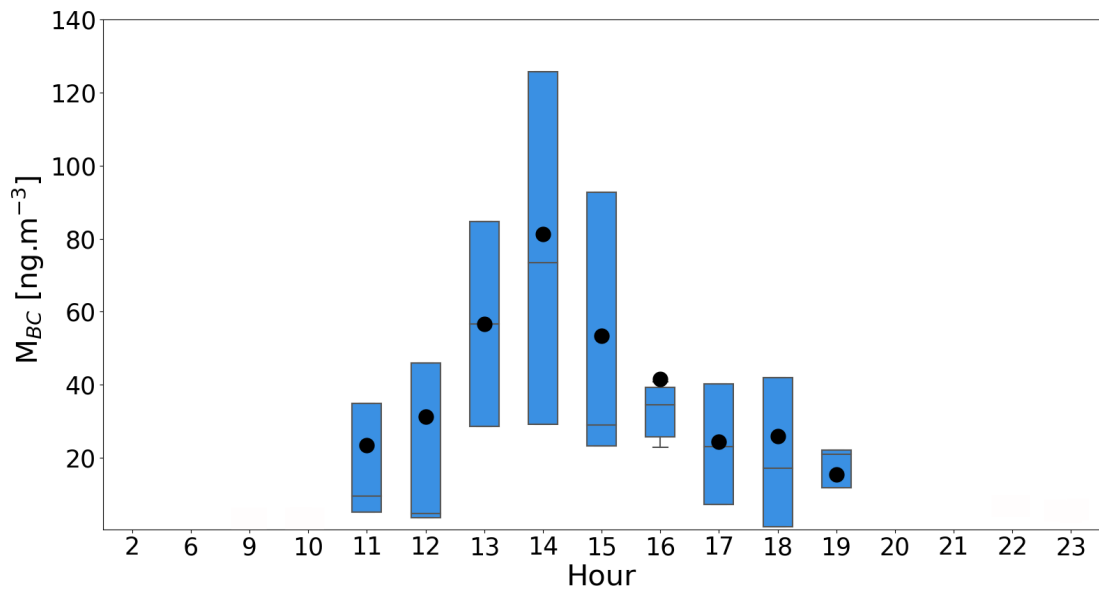

Figure S8: Hourly variation of BC mass concentration in winter under PBL-influenced conditions. Statistics of the boxplot are the same as Fig. 7. Times without boxplot are due to the selected PBL-influenced hours, which are mostly during the daytime.

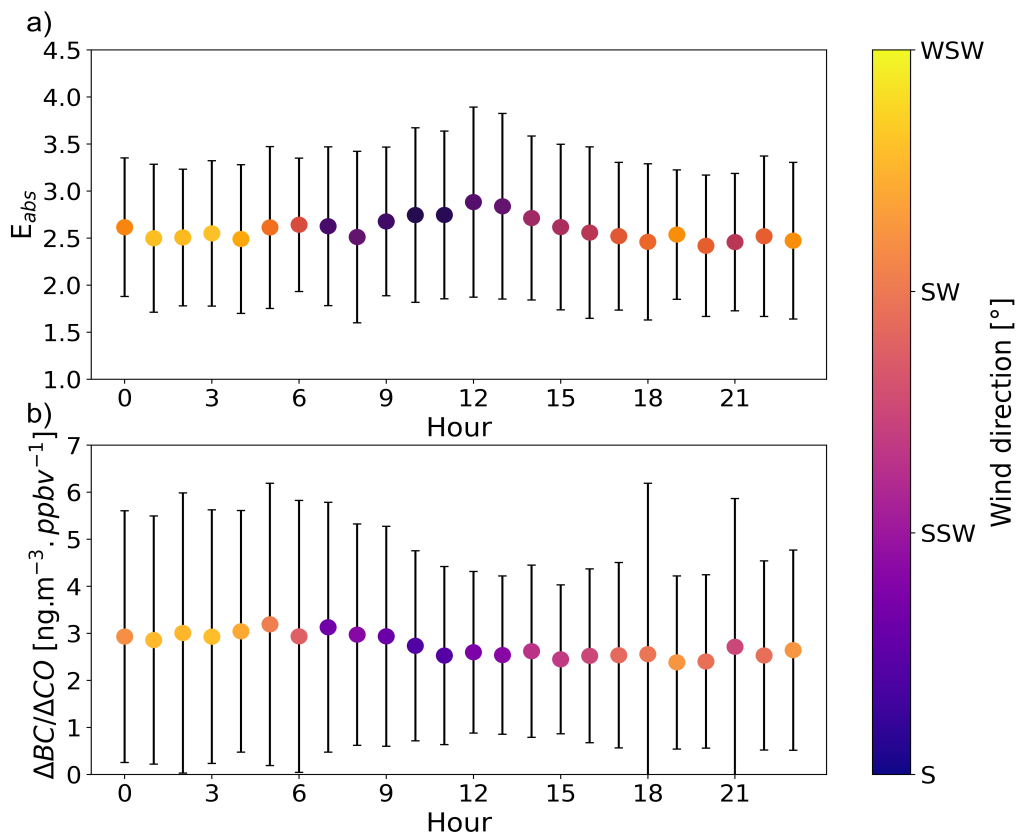

Figure S9: Hourly variation of  $E_{abs}$  and  $\Delta BC/\Delta CO$  values in summer. Dots represent mean values and whiskers are one standard deviation. Dots are colored as a function of the wind direction.

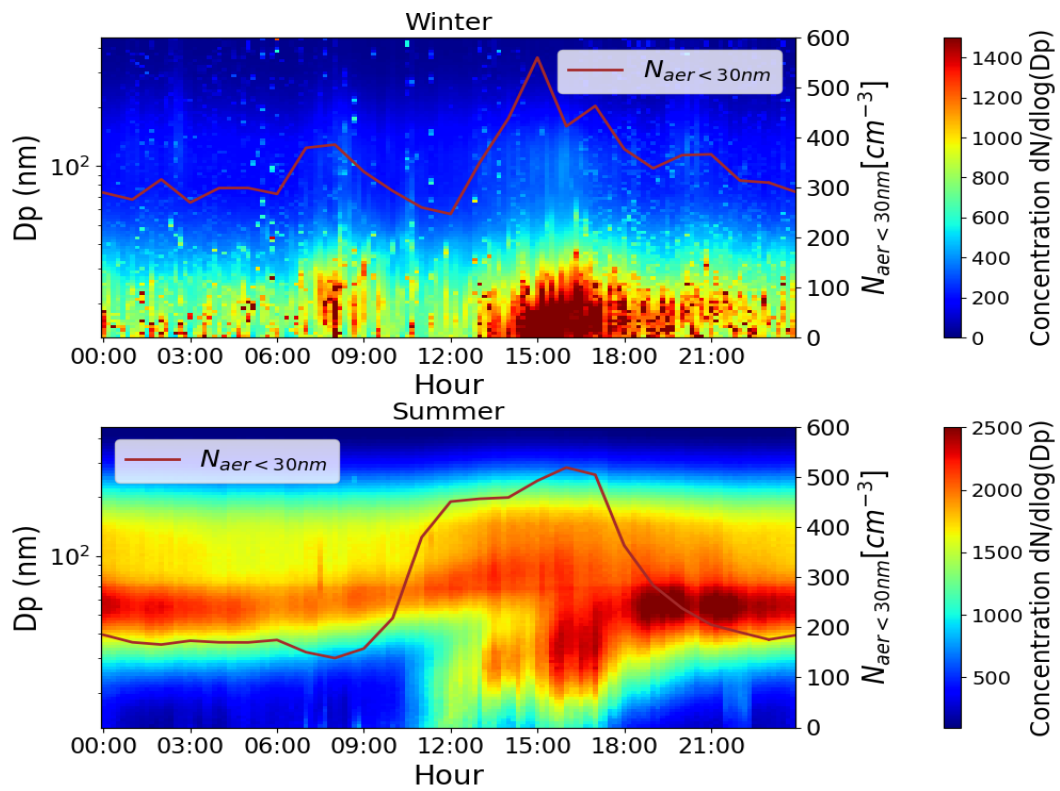

Figure S10: Average diurnal cycle of aerosols number size distribution in (a) winter and (b) summer. Number concentrations of the nucleation mode (<30nm) are overlaid in red.
